# Supplementary material for: The controlling nutritional status score and clinical outcomes in patients with heart failure: Pool analysis of observational studies
Source: PubMed Central journal article supplement (PMC9357929; doi:10.3389/fcvm.2022.961141), 2022-07-25
Supplement: Data_Sheet_1.pdf [file Data_Sheet_1.pdf]

## Supplementary file 1. Quality Assessment of the Included Studies

| Study                   | Selection<br>(stars awarded) | Comparability<br>(stars awarded) | Outcome<br>(stars awarded) | Quality (total<br>stars)* |
|-------------------------|------------------------------|----------------------------------|----------------------------|---------------------------|
| Narumi 2013             | 2                            | 1                                | 2                          | Fair (5)                  |
| Nochioka 2013           | 3                            | 2                                | 3                          | Good (8)                  |
| Nakagomi 2016           | 3                            | 2                                | 2                          | Good (8)                  |
| Iwakami 2017            | 2                            | 1                                | 2                          | Good (7)                  |
| La Rovere 2017          | 4                            | 1                                | 2                          | Good (8)                  |
| Nishi 2017              | 3                            | 2                                | 3                          | Good (8)                  |
| Sze 2017                | 3                            | 2                                | 3                          | Good (8)                  |
| Shirakabe 2018          | 2                            | 1                                | 2                          | Good (7)                  |
| Yoshihisa 2018          | 3                            | 1                                | 2                          | Good (8)                  |
| Alvarez-Alvarez<br>2018 | 3                            | 1                                | 2                          | Fair (6)                  |
| Hamada 2018             | 3                            | 2                                | 3                          | Good (8)                  |
| Chien 2019              | 2                            | 1                                | 2                          | Good (7)                  |
| Uemura 2020             | 2                            | 1                                | 2                          | Fair (6)                  |
| Komorita 2020           | 2                            | 1                                | 2                          | Good (7)                  |
| Sze 2021                | 3                            | 2                                | 3                          | Fair (6)                  |
| Ikeya 2021              | 3                            | 2                                | 3                          | Good (8)                  |
| Lu 2021                 | 3                            | 2                                | 3                          | Fair (6)                  |
| Takada 2021             | 3                            | 2                                | 3                          | Good (8)                  |

\* Included studies were graded in quality as good if awarded with  $\geq 7$  stars or fair if 4-6 stars.

## Supplementary file 2. Adjusted confounders in the included studies

---

| Studies        | Adjusted confounders                                                                                                                                                                 |
|----------------|--------------------------------------------------------------------------------------------------------------------------------------------------------------------------------------|
| Narumi 2013    | Age, gender, New York Heart Association functional class, and plasma brain natriuretic peptide levels                                                                                |
| Nochioka 2013  | Age, sex, heart rate, diabetes mellitus, dyslipidemia, history of cancer, current or former smoking, LVEF, BNP levels, anemia, CKD, and treatment (ACEI, ARB, and $\beta$ -blocker). |
| Nakagomi 2016  | Age, BMI, mCIMT, LVEF, eGFR, CRP, BNP, Hb, TNF- $\alpha$ , and $\beta$ -blocker, spironolactone.                                                                                     |
| Iwakami 2017   | All potential confounders, some of which were represented by the OPTIMIZE-HF nomogram to avoid overfitting; OPTIMIZE-HF nomogram, hemoglobin, history of malignancy, and statin use. |
| La Rovere 2017 | MAGGIC score, 6MWT                                                                                                                                                                   |
| Nishi 2017     | Age, sex, CONUT scores as a continuous variable, previous history of HF hospitalization, log BNP, and use of therapeutic agents at admission (tolvaptan and aldosterone antagonists) |
| Sze 2017       | Age, sex, haemoglobin, atrial fibrillation, log NTproBNP, creatinine, sodium, recurrent falls, and the presence of ischaemic heart disease                                           |
| Shirakabe 2018 | Age, SBP, HR, creatinine, total bilirubin, sodium, CRP, hemoglobin, LVEF                                                                                                             |
| Yoshihisa 2018 | Age, sex, systolic blood pressure, heart rate, New York Heart Association class, presence of ischaemic aetiology, hypertension, diabetes,                                            |

---

---

|                      |                                                                                                                                                                                                                     |
|----------------------|---------------------------------------------------------------------------------------------------------------------------------------------------------------------------------------------------------------------|
|                      | dyslipidemia, chronic kidney disease, anaemia, atrial fibrillation, B-type natriuretic peptide and LVEF                                                                                                             |
| Alvarez-Alvarez 2018 | Age, sex, ischaemic aetiology, atrial fibrillation, sodium, eGFR, Hb, Lad, ACEI/ARB                                                                                                                                 |
| Hamada 2018          | Age $\geq$ 85 years (median), New York Heart Association functional class III/IV at discharge, hypertension, stroke, complete right bundle branch block, beta-blocker                                               |
| Chien 2019           | Age, BMI, sex, prior heart failure, hypertension, cardiovascular disease, diabetes, SBP, heart rate, and atrial fibrillation, hyperlipidaemia, estimated glomerular filtration rate, and brain natriuretic peptide. |
| Uemura 2020          | Age, gender, BMI, history of admission due to heart failure, history of coronary artery disease, hemoglobin, eGFR, and LVEF                                                                                         |
| Komorita 2020        | Age, previous hospitalization for HF, diabetes mellitus, ln-BNP                                                                                                                                                     |
| Sze 2021             | Age, BMI, AF compared with sinus rhythm, NYHA, Charlson score, log[NT-proBNP], Hb, and eGFR                                                                                                                         |
| Ikeya 2021           | Age, sex and liver function parameters (total bilirubin, aspartate aminotransferase, alanine aminotransferase, and $\gamma$ -glutamyl transferase).                                                                 |
| Lu 2021              | Age, sex, smoking, SBP, DBP, UA, spartate aminotransferase, NT-proBNP, NYHA, LVEF, LVESD, LVEDD, AF                                                                                                                 |
| Takada 2021          | Age, BMI, NYHA, atrial fibrillation, DM, history of CABG, LVEF, SBP, heart rate, BNP, eGFR, anaemia, serum sodium, daily furosemide dose                                                                            |

---

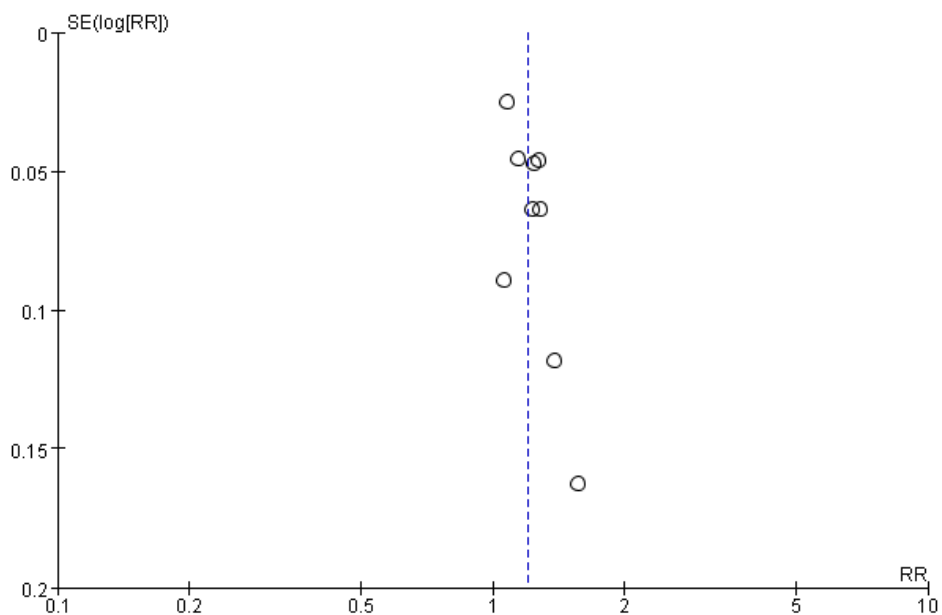

**Supplementary file 3. Publication bias evaluated by funnel plot: all-cause mortality in HF patients associated with Per 1 increase of COUNT score**

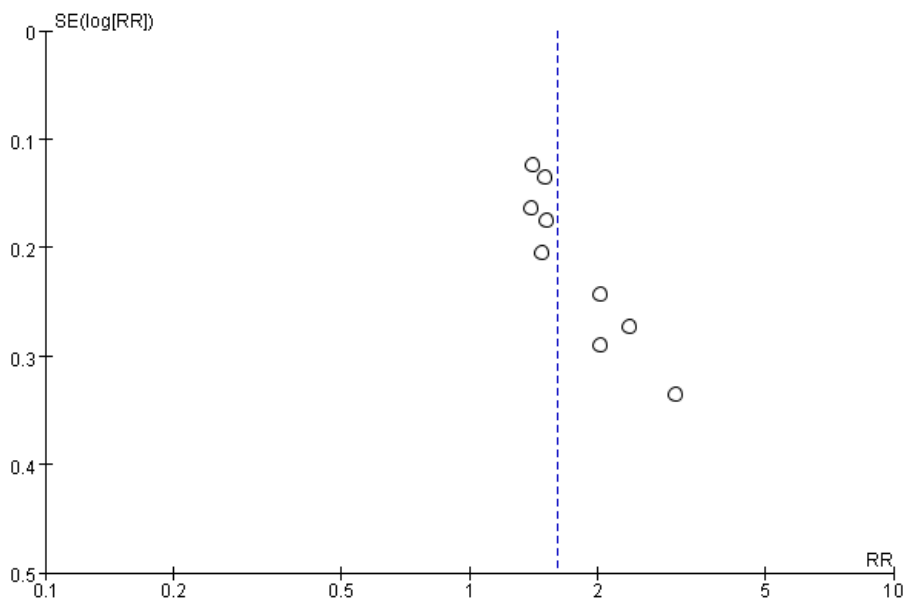

**Supplementary file 4. Publication bias evaluated by funnel plot: All-cause mortality in HF patients associated with malnutrition status defined by COUNT score**

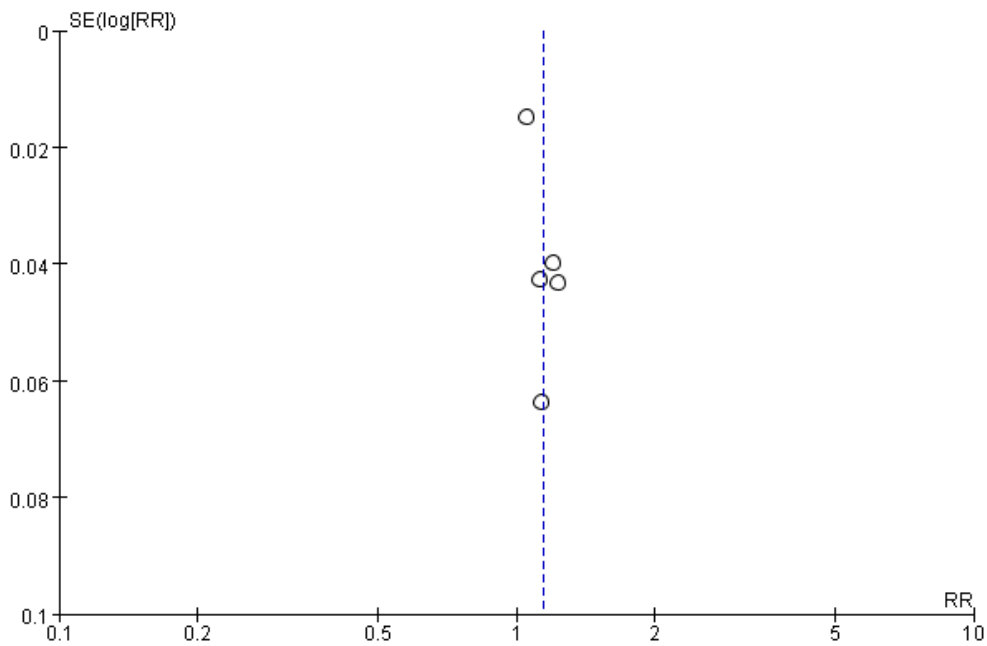

**Supplementary file 5. Publication bias evaluated by funnel plot: MACEs in HF patients associated with Per 1 increase of COUNT score**

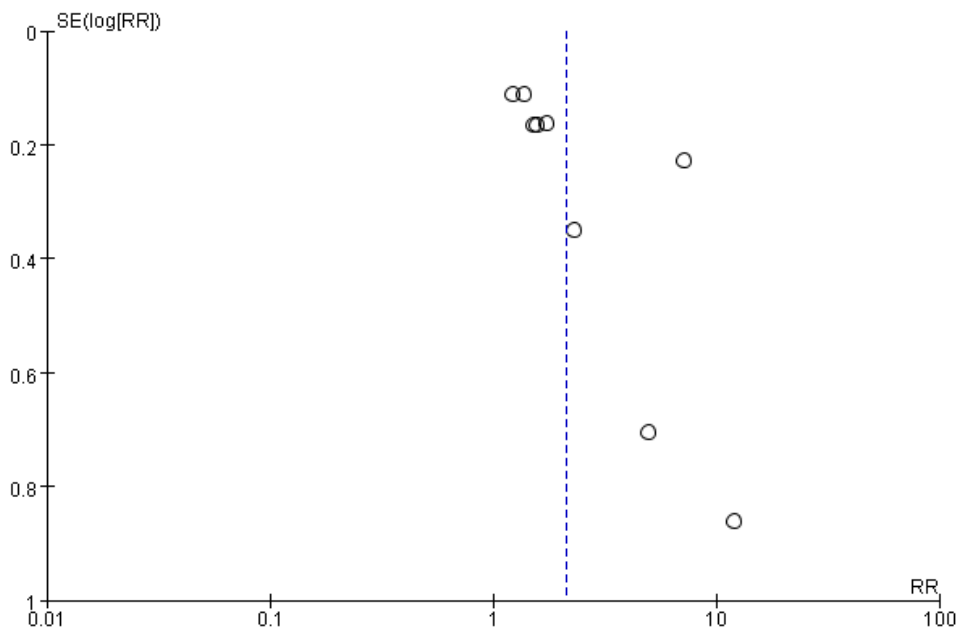

**Supplementary file 6. Publication bias evaluated by funnel plot: MACEs in HF patients associated with malnutrition status defined by COUNT score**
